# Supplementary material for: Electrochemical and electrocatalytic reaction characteristics of boron-incorporated graphenevia a simple spin-on dopant process
Source: Royal Society of Chemistry journal article supplement (doi:10.1039/c7ta09517a), 2018-01-01
Supplement: c7ta09517a1.pdf [file c7ta09517a1.pdf]

## Supplementary Information

### Electrochemical and electrocatalytic reaction characteristics of boron-incorporated graphene via a simple spin-on dopant process

A-Rang Jang,<sup>†a,b</sup> Young-Woo Lee,<sup>†a,c</sup> Sang-Seok Lee,<sup>d</sup> John Hong,<sup>a</sup> Seong-Ho Beak,<sup>e</sup>  
Sangyeon Pak,<sup>a</sup> Juwon Lee,<sup>a</sup> Hyeon Suk Shin,<sup>b</sup> Docheon Ahn,<sup>f</sup> Woong-Ki Hong,<sup>g</sup> SeungNam  
Cha,<sup>a</sup> Jung Inn Sohn,<sup>\*a</sup> and Il-Kyu Park<sup>\*d</sup>

<sup>a</sup> *Department of Engineering Science, University of Oxford, Oxford OX1 3PJ, UK. \*E-mail: junginn.sohn@eng.ox.ac.uk; Fax: +44-1865-273010; Tel: +44-1865-273912*

<sup>b</sup> *Department of Energy Engineering, Ulsan National Institute of Science and Technology (UNIST), UNIST-gil 50, Ulsan 44919, Republic of Korea*

<sup>c</sup> *Department of Energy Systems, Soonchunhyang University, Asan, Chungcheongnam-do Jeollabuk-do 31538, Republic of Korea*

<sup>d</sup> *Department of Materials Science and Engineering, Seoul National University of Science and Technology, Seoul 139-743, Republic of Korea. \*E-mail: pik@seoultech.ac.kr; Fax: +82029736657; Tel: +82029706349*

<sup>e</sup> *Division of Nano-Energy Convergence Research, DGIST, Daegu 42988, Republic of Korea*

<sup>f</sup> *Beamline Department, Pohang Accelerator Laboratory, Pohang 790-784, Republic of Korea*

<sup>g</sup> *Jeonju Center, Korea Basic Science Institute, Jeonju, Jeollabuk-do 54907, Republic of Korea*

<sup>†</sup> These authors contributed equally to this work.

## Experimental method

### *Fabrication of boron-doped graphene*

An SOD procedure was used to incorporate elemental boron into graphene. SOD film was prepared on Si substrate by spin-coating a boron-containing dopant solution (Filmtronic B155 compounds). The SOD films were placed at a distance of 10 mm above the graphene flakes (Graphene nanopowder with 3 nm of thickness and ~8  $\mu\text{m}$  of lateral dimensions, Grade AO-1, Graphene supermarket) or CVD-G to avoid direct contact between the graphene and SOD film. The samples were loaded into a tube furnace, and the temperature was increased at 15°C/min to 500 and 600 °C with 2000 sccm of Ar gas for 5 min.<sup>R1</sup>

### *Characterization of boron-doped graphene*

The surface morphology of pristine graphene flakes, SOD500-GFs, and SOD600-GFs were characterized by field-emission scanning electron microscopy (FE-SEM, Hitachi). The elemental distribution was examined using an energy-dispersive X-ray spectrometer (EDS). The Raman spectra were measured using a micro Raman spectrometer (HORIBA) with a 532-nm laser. The chemical bonding states of the SOD-treated graphene flakes were investigated by FT-IR spectroscopy and X-ray photoelectron spectroscopy (XPS, Thermo Fisher Scientific). Furthermore, to compare the specific surface area for three as-prepared samples, we performed the nitrogen adsorption and desorption isotherms using a Micromeritics ASAP 2020 at 77K. Also, the specific surface area for each sample was calculated using the BET adsorption isotherm theory based on following equations:

$$\left[ \frac{1}{V_a \left( \frac{P_0}{P} - 1 \right)} = \frac{C - 1}{V_m C} \times \frac{P}{P_0} + \frac{1}{V_m C} \right]$$

where,  $P$  is partial vapor pressure of adsorbate nitrogen gas in equilibrium with the surface at 77.4 K,  $P_0$  is saturated pressure of adsorbate nitrogen gas,  $V_a$  is volume of gas adsorbed at STP,  $V_m$  is volume of gas adsorbed at STP to produce an apparent monolayer on the sample surface,

and  $C$  is dimensionless constant that is related to the enthalpy of adsorption of the adsorbate nitrogen gas on sample.

$$S = \frac{V_m \times N \times a}{m \times 22400}$$

where  $A$  is specific surface area,  $N$  is Avogadro constant,  $a$  is effective cross-sectional area of one adsorbate molecule (0.162 nm<sup>2</sup> for nitrogen), and  $m$  is mass of sample.

#### *Electrochemical property analysis of boron-doped graphene*

The electrochemical properties of the boron-doped graphene flakes were measured in a three-electrode system using a potentiostat (Autolab PGSTAT302N). The pseudo-capacitive and electrochemical oxygen reduction of the treated flakes were estimated using cyclic voltammograms (CVs) in 1.0 M KOH electrolyte.

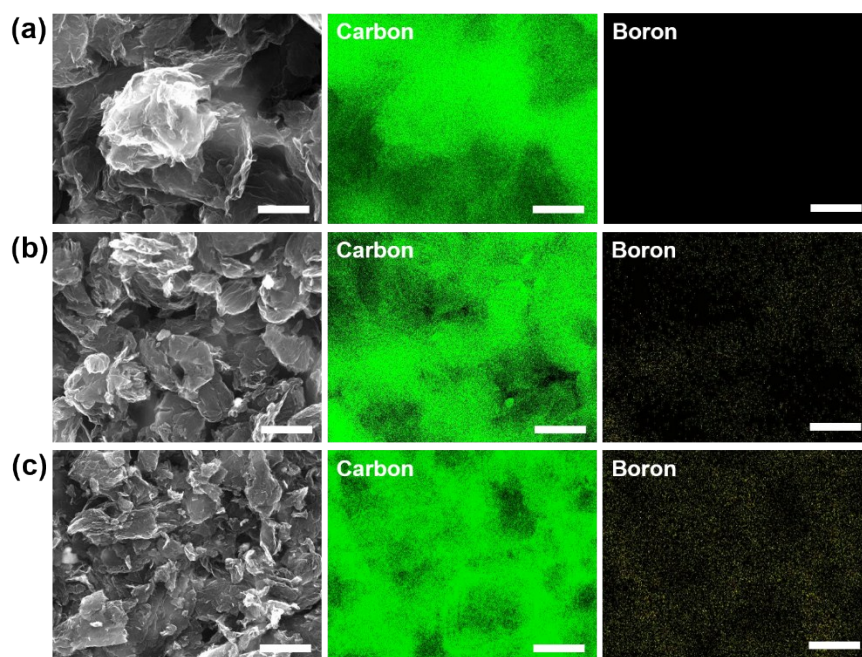

**Figure S1.** FE-SEM images and elemental mapping of the carbon (green), and boron (yellow) for (a) pristine GFs, (b) SOD500-GFs and (c) SOD600-GFs. Scale bar is 10 μm.

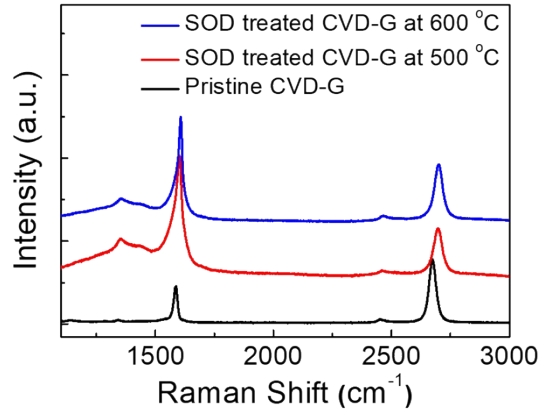

**Figure S2.** Raman spectra of pristine CVD-G, and SOD-treated CVD-G at 500 °C and 600 °C.

We confirmed that the SOD method can apply to a monolayer graphene grown by chemical vapor deposition method (CVD-G). Raman spectroscopy is a powerful nondestructive tool for identifying the doping of graphene. Fig. S2 shows the Raman spectra of pristine CVD-G and SOD-treated CVD-G at 500 °C and 600 °C. The Raman spectra of all the samples show the G and 2D peaks at 1586  $\text{cm}^{-1}$ , and 2674  $\text{cm}^{-1}$  for the pristine CVD-G, 1600  $\text{cm}^{-1}$  and 2698  $\text{cm}^{-1}$  for SOD treated CVD-G at 500 °C, and 1608  $\text{cm}^{-1}$  and 2700  $\text{cm}^{-1}$  for SOD treated CVD-G at 600 °C, respectively, confirming the structural properties of graphene. However, interestingly, both the G and 2D peak positions of SOD-treated CVD-G are shifted to higher wave numbers compared to the pristine CVD-G. Moreover, SOD-treated CVD-G samples show an increase in peak intensities of D peaks. These Raman results clearly indicate that the SOD-treated CVD-G is successfully p-type doped by boron dopants.<sup>R2,R3</sup>

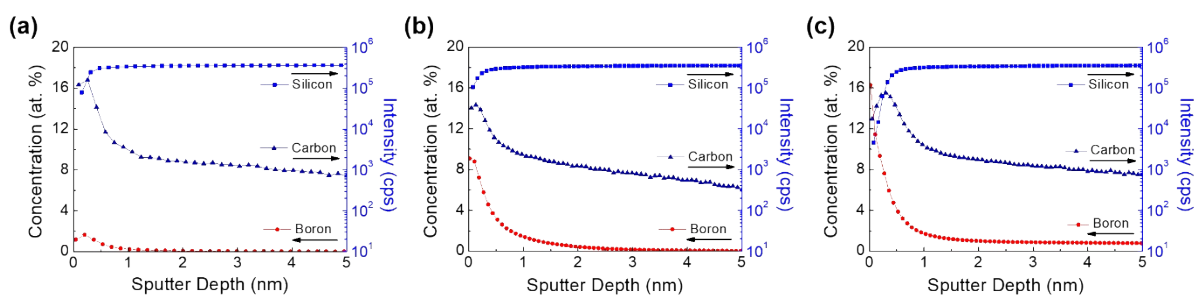

**Figure S3.** Secondary ion mass spectroscopy (SIMS) depth profiles results of (a) pristine CVD-G, and SOD-treated CVD-G (b) at 500 °C and (c) 600 °C.

| Material                    | Conductivity (S/m) |
|-----------------------------|--------------------|
| Pristine CVD-G              | $0.19 \times 10^4$ |
| SOD treated CVD-G at 500 °C | $1.86 \times 10^4$ |
| SOD treated CVD-G at 600 °C | $2.01 \times 10^4$ |

**Table S1.** The electrical conductivity of pristine CVD-G, and SOD-treated CVD-G at 500 °C and 600 °C.

In order to further confirm the incorporation of boron dopants into CVD-G crystal, we performed secondary ion mass spectroscopy (SIMS) depth profiles. **Fig. S3** shows secondary ion mass spectroscopy (SIMS) depth profiles results of (a) pristine CVD-G, and SOD-treated CVD-G (b) at 500 °C and (c) 600 °C. We clearly observed the boron signal from the both of SOD treated CVD-G at 500 °C and 600 °C, whereas no boron signal was detected from pristine CVD-G before SOD treatment. These results further confirm that CVD-G is successfully doped with boron through relatively low-temperature processing of SODs. The electrical properties of pristine CVD-G and SOD-treated CVD-G are measured using a Hall measurement system

(ECOPIA HMS-5000). The electrical conductivity of SOD-treated CVD-G is enhanced about 10 times higher than that of pristine CVD-G, because of the p-type doping effect of graphene by boron dopants (**Table S1**). By combining the structural and chemical analyses, it can be expected that the SOD-treated graphene can be acted as the active site for pseudo-capacitive behavior in the supercapacitor and ORR in alkaline fuel cell because the boron doped graphene with p-type conductivity can not only improve electrical conductivity compared to pure graphene but also can be acted as an electron acceptor for reaction with the  $\text{OH}^-$  ions.

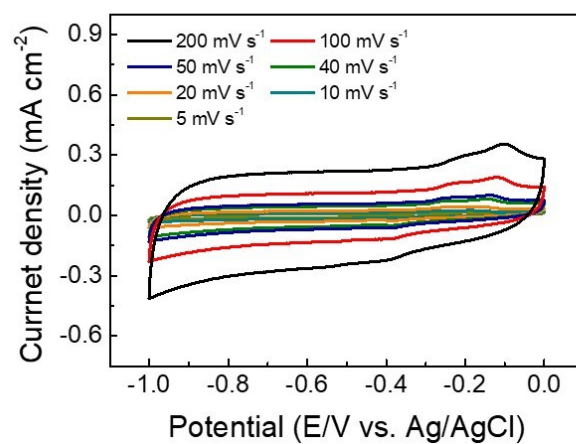

**Figure S4.** CV curves for the pristine GFs at different scan rates from 5 to 200 mV s<sup>-1</sup>.

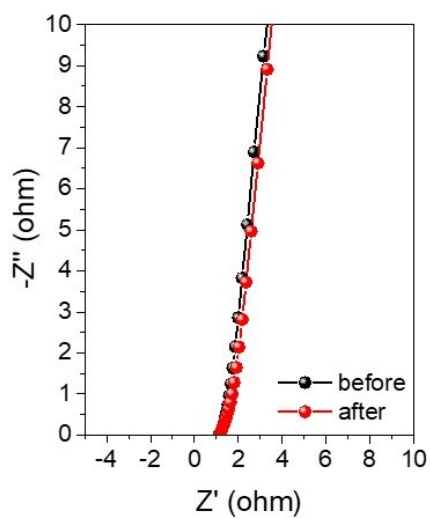

**Figure S5.** Nyquist plots of the SOD600-GFs before and after stability tests.



## References

- R1. D.-Y. Sin, I.-K. Park and H.-J. Ahn, *RSC Adv.*, 2016, **6**, 58823-58830.
- R2. L. Panchakarla, K. Subrahmanyam, S. Saha, A. Govindaraj, H. Krishnamurthy, U. Waghmare and C. Rao, *Adv. Mater.*, 2009, **21**, 4726-4730.
- R3. M. Kalbac, A. Reina-Cecco, H. Farhat, J. Kong, L. Kavan and M. S. Dresselhaus, *ACS Nano*, 2010, **4**, 6055-6063.
